# Supplementary material for: The estrous cycle surpasses sex differences in regulating the transcriptome in the rat medial prefrontal cortex and reveals an underlying role of early growth response 1
Source: PubMed Central journal article supplement (PMC4667491; doi:10.1186/s13059-015-0815-x), 2015-12-02

**a**Proestrus  
vs  
Diestrus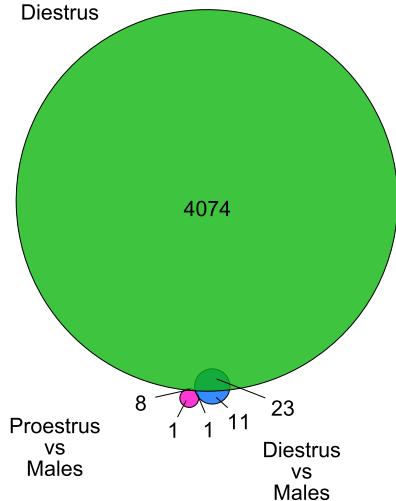**b**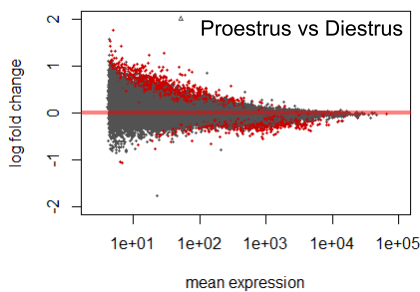**c**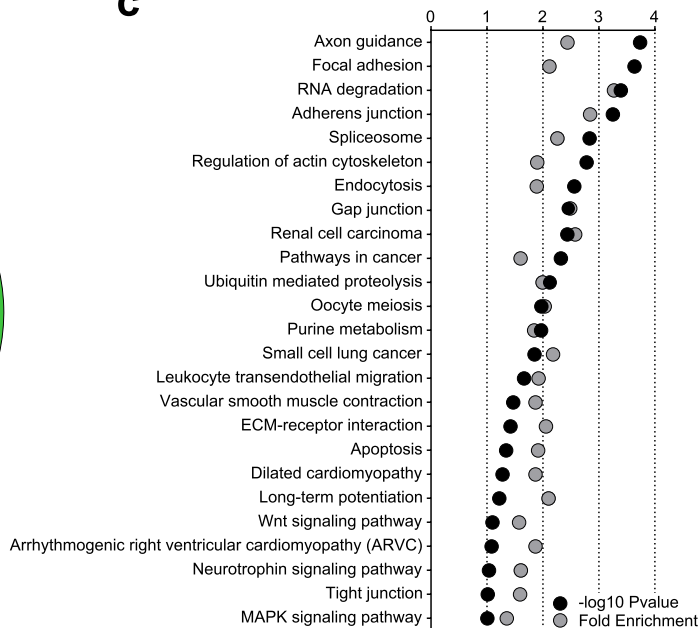**d**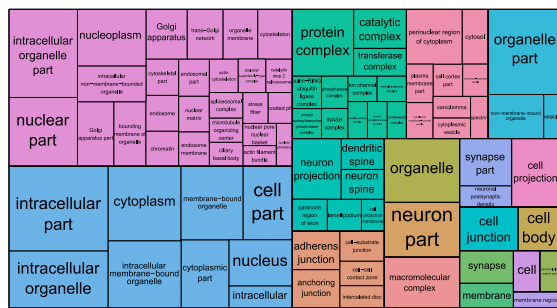

Supplement: 13059_2015_815_MOESM9_ESM.pdf [file 13059_2015_815_MOESM9_ESM.pdf]
