# Supplementary material for: The estrous cycle surpasses sex differences in regulating the transcriptome in the rat medial prefrontal cortex and reveals an underlying role of early growth response 1
Source: PubMed Central journal article supplement (PMC4667491; doi:10.1186/s13059-015-0815-x), 2015-12-02

**a**Zeisel *et al.*, 2015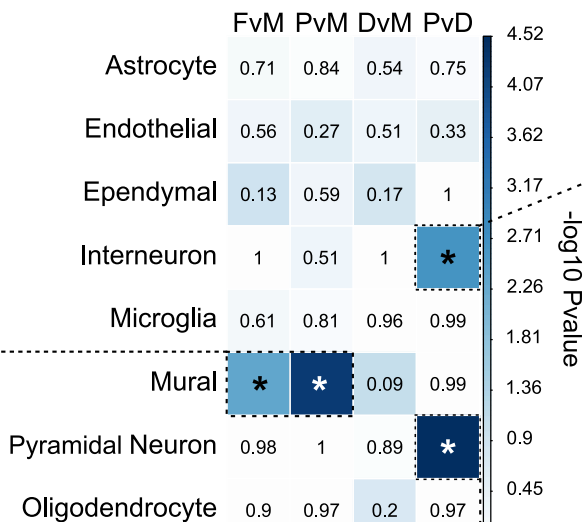**b**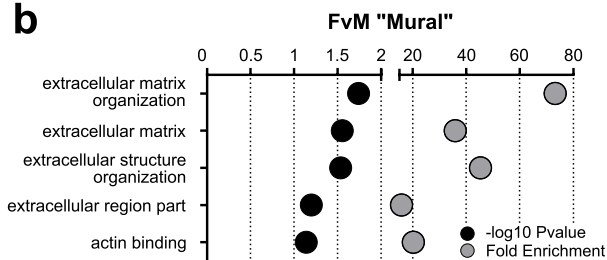**c**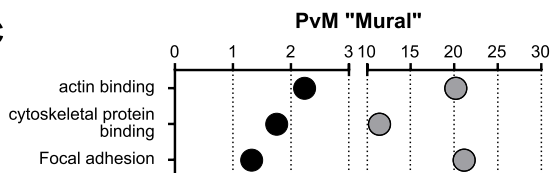**d**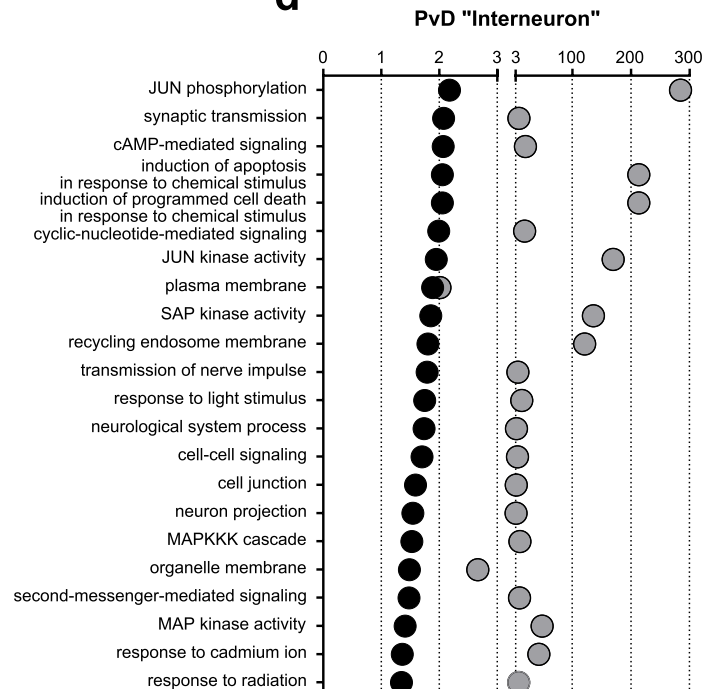**e**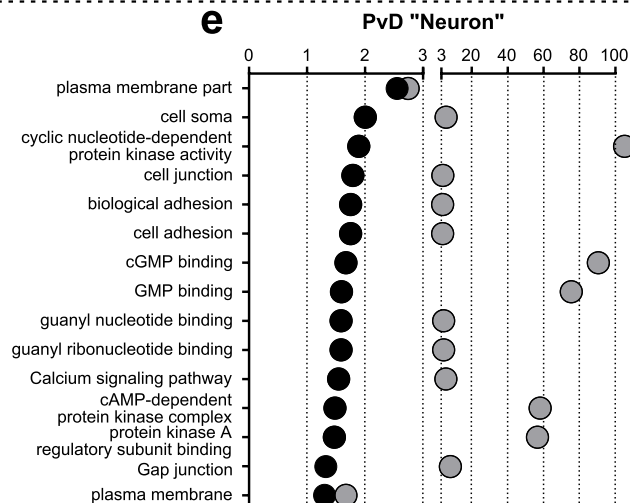

Supplement: 13059_2015_815_MOESM11_ESM.pdf [file 13059_2015_815_MOESM11_ESM.pdf]
