# Supplementary material for: The estrous cycle surpasses sex differences in regulating the transcriptome in the rat medial prefrontal cortex and reveals an underlying role of early growth response 1
Source: PubMed Central journal article supplement (PMC4667491; doi:10.1186/s13059-015-0815-x), 2015-12-02

**a**Zhang *et al.*, 2014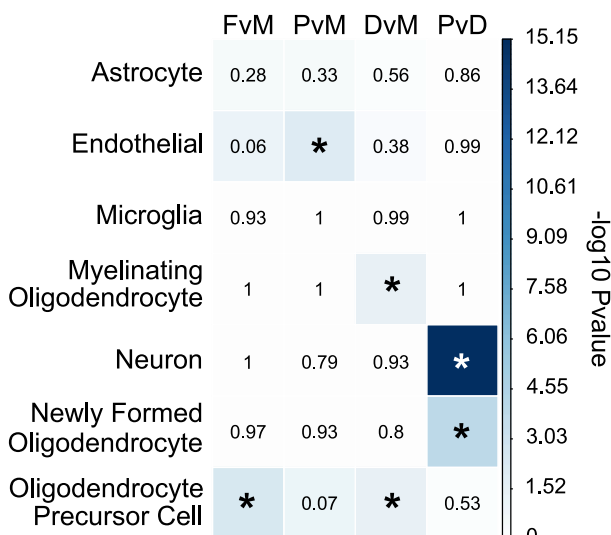**b**

FvM "Oligodendrocyte Precursor Cell"

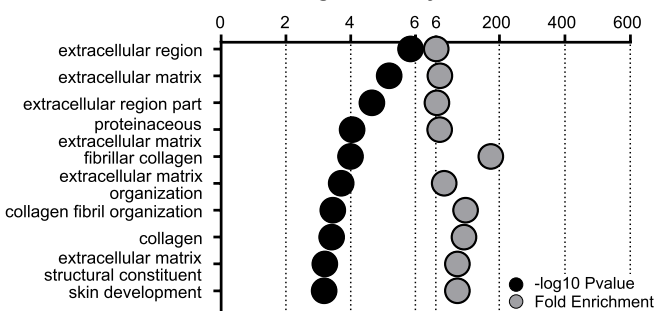**c**

PvM "Endothelial"

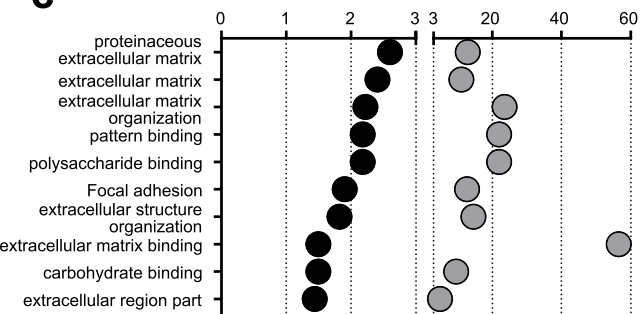**d**

DvM "Oligodendrocyte Precursor Cell"

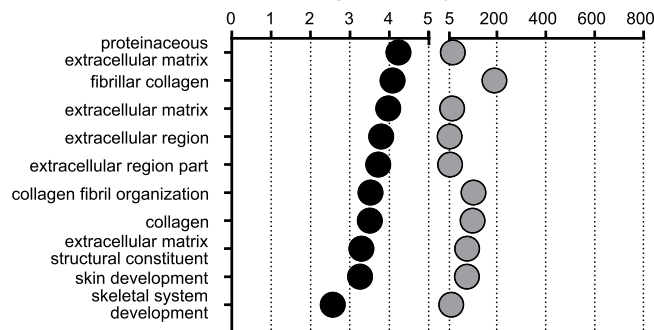**e**

PvD "Neuron"

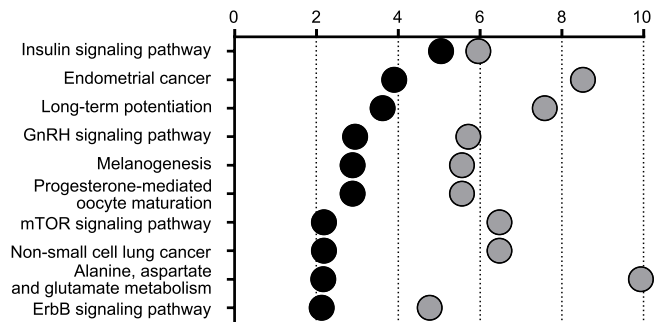**f**

PvD "Newly Formed Oligodendrocyte"

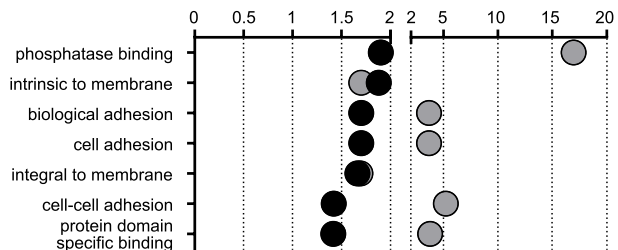

Supplement: 13059_2015_815_MOESM12_ESM.pdf [file 13059_2015_815_MOESM12_ESM.pdf]
